# Supplementary material for: ATR-FTIR Spectroscopy with Chemometrics for Analysis of Saliva Samples Obtained in a Lung-Cancer-Screening Programme: Application of Swabs as a Paradigm for High Throughput in a Clinical Setting
Source: MDPI journal article supplement (doi:10.3390/jpm13071039), 2023-06-25
Supplement: s1 [file s1]

# Electronic Supplementary Information

## **ATR-FTIR Spectroscopy with Chemometrics for Analysis of Saliva Samples Obtained in a Lung-Cancer-Screening Programme: Application of Swabs as a Paradigm for High Throughput in a Clinical Setting**

**Francis L Martin <sup>1,2,\*</sup>, Andrew W Dickinson <sup>2</sup>, Tarek Saba <sup>2</sup>, Thomas Bongers <sup>2</sup>, Maneesh N Singh <sup>1,3</sup>, Danielle Bury <sup>1,\*</sup>**

1 Biocel UK Ltd., Hull HU10 6TS, UK; mnsingh@biocel.uk

2 Department of Cellular Pathology, Blackpool Teaching Hospitals NHS Foundation Trust, Whinney Heys Road, Blackpool FY3 8NR, UK; aw.dickinson@hotmail.com (A.W.D.); dr.saba@nhs.net (T.S.); thomas.bongers@nhs.net (T.B.)

3 Chesterfield Royal Hospital, Chesterfield Road, Calow, Chesterfield S44 5BL, UK

\* Correspondence: flm13@biocel.uk (F.L.M.); danielle.bury@nhs.net (D.B.)

| Multivariate linear model |        |        |          |                |        |  |
|---------------------------|--------|--------|----------|----------------|--------|--|
| PC2 vs PC3 MANOVA         |        |        |          | No Subtraction |        |  |
| Intercept                 | Value  | Num DF | Den DF   | F Value        | Pr > F |  |
| Wilks' lambda             | 0.9622 | 2.0000 | 207.0000 | 4.0651         | 0.0185 |  |
| Pillai's trace            | 0.0378 | 2.0000 | 207.0000 | 4.0651         | 0.0185 |  |
| Hotelling-Lawley trace    | 0.0393 | 2.0000 | 207.0000 | 4.0651         | 0.0185 |  |
| Roy's greatest root       | 0.0393 | 2.0000 | 207.0000 | 4.0651         | 0.0185 |  |
| Diagnosis                 | Value  | Num DF | Den DF   | F Value        | Pr > F |  |
| Wilks' lambda             | 0.8325 | 2.0000 | 207.0000 | 20.8212        | 0.0000 |  |
| Pillai's trace            | 0.1675 | 2.0000 | 207.0000 | 20.8212        | 0.0000 |  |
| Hotelling-Lawley trace    | 0.2012 | 2.0000 | 207.0000 | 20.8212        | 0.0000 |  |
| Roy's greatest root       | 0.2012 | 2.0000 | 207.0000 | 20.8212        | 0.0000 |  |

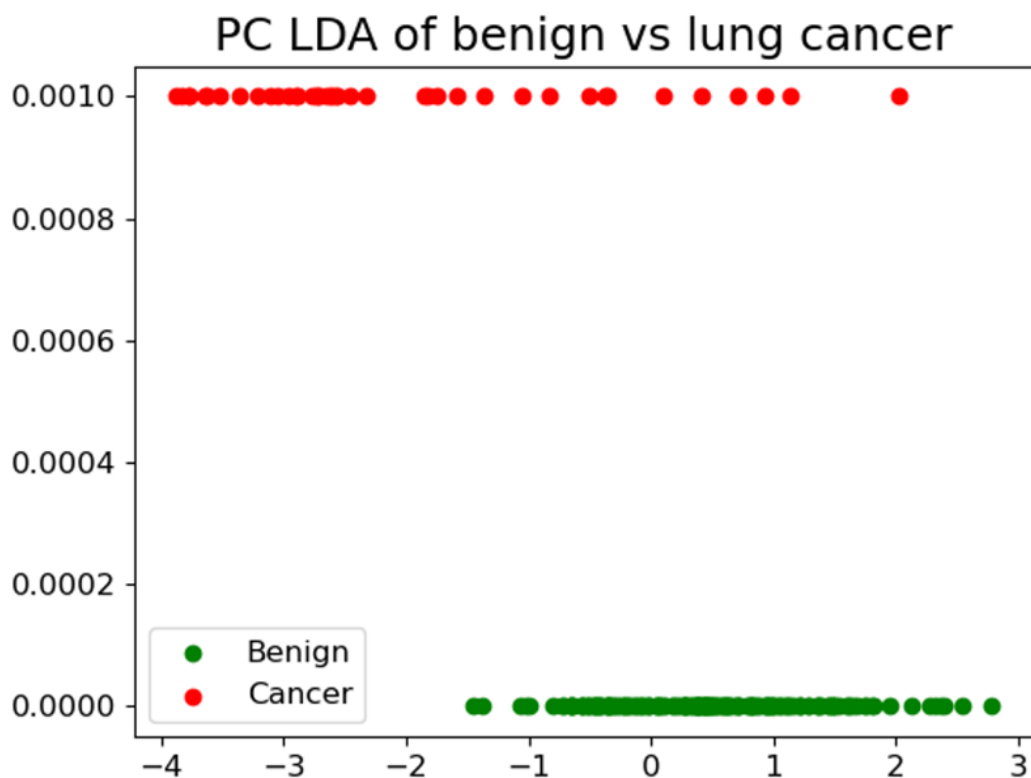

**Figure S1** Exploratory analysis of saliva samples on a swab following PCA. Following pairwise comparisons of benign *versus* cancer, four independent multivariate analysis of variance (MANOVA) tests were undertaken to test for significance of segregation. Separation between the categories is also examined employing PCA-LDA (using the first 10 PCs) in a 1-D scores plot.

| Multivariate linear model |        |        |          |                     |        |  |
|---------------------------|--------|--------|----------|---------------------|--------|--|
| =====                     |        |        |          |                     |        |  |
| PC2 vs PC3 MANOVA         |        |        |          | Dry swab subtracted |        |  |
| -----                     |        |        |          |                     |        |  |
| Intercept                 | Value  | Num DF | Den DF   | F Value             | Pr > F |  |
| -----                     |        |        |          |                     |        |  |
| Wilks' lambda             | 0.9622 | 2.0000 | 207.0000 | 4.0651              | 0.0185 |  |
| Pillai's trace            | 0.0378 | 2.0000 | 207.0000 | 4.0651              | 0.0185 |  |
| Hotelling-Lawley trace    | 0.0393 | 2.0000 | 207.0000 | 4.0651              | 0.0185 |  |
| Roy's greatest root       | 0.0393 | 2.0000 | 207.0000 | 4.0651              | 0.0185 |  |
| -----                     |        |        |          |                     |        |  |
|                           |        |        |          |                     |        |  |
| -----                     |        |        |          |                     |        |  |
| Diagnosis                 | Value  | Num DF | Den DF   | F Value             | Pr > F |  |
| -----                     |        |        |          |                     |        |  |
| Wilks' lambda             | 0.8325 | 2.0000 | 207.0000 | 20.8212             | 0.0000 |  |
| Pillai's trace            | 0.1675 | 2.0000 | 207.0000 | 20.8212             | 0.0000 |  |
| Hotelling-Lawley trace    | 0.2012 | 2.0000 | 207.0000 | 20.8212             | 0.0000 |  |
| Roy's greatest root       | 0.2012 | 2.0000 | 207.0000 | 20.8212             | 0.0000 |  |
| =====                     |        |        |          |                     |        |  |

## PC LDA of benign vs lung cancer (dry swab subtracted)

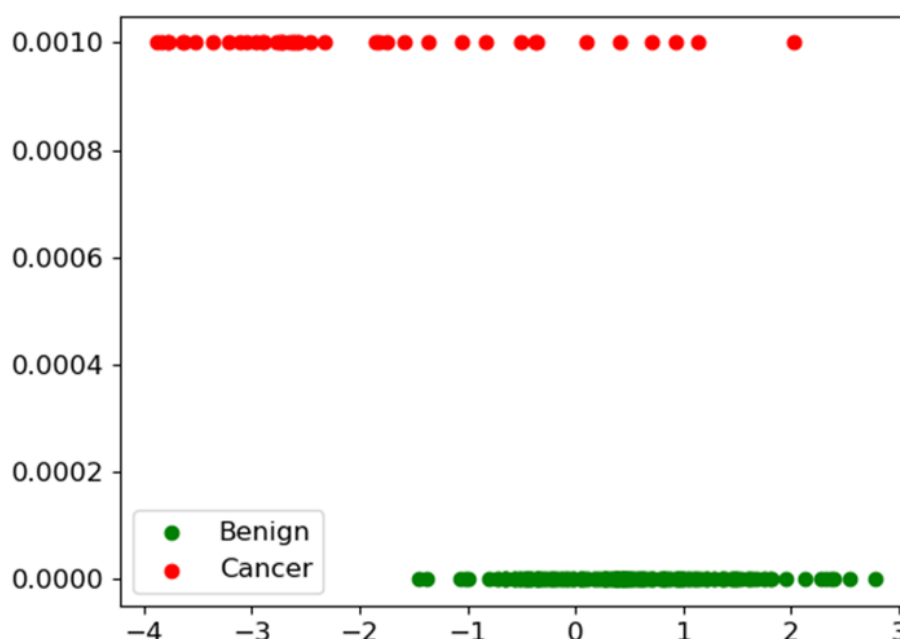

**Figure S2** Exploratory analysis of saliva samples minus a dry swab spectral signature following PCA. Following pairwise comparisons of benign *versus* cancer, four independent multivariate analysis of variance (MANOVA) tests were undertaken to test for significance of segregation. Separation between the categories is also examined employing PCA-LDA (using the first 10 PCs) in a 1-D scores plot.

| Multivariate linear model |        |        |          |                     |        |  |
|---------------------------|--------|--------|----------|---------------------|--------|--|
| PC2 vs PC3 MANOVA         |        |        |          | Wet swab subtracted |        |  |
| Intercept                 | Value  | Num DF | Den DF   | F Value             | Pr > F |  |
| Wilks' lambda             | 0.9622 | 2.0000 | 207.0000 | 4.0651              | 0.0185 |  |
| Pillai's trace            | 0.0378 | 2.0000 | 207.0000 | 4.0651              | 0.0185 |  |
| Hotelling-Lawley trace    | 0.0393 | 2.0000 | 207.0000 | 4.0651              | 0.0185 |  |
| Roy's greatest root       | 0.0393 | 2.0000 | 207.0000 | 4.0651              | 0.0185 |  |
| Diagnosis                 | Value  | Num DF | Den DF   | F Value             | Pr > F |  |
| Wilks' lambda             | 0.8325 | 2.0000 | 207.0000 | 20.8212             | 0.0000 |  |
| Pillai's trace            | 0.1675 | 2.0000 | 207.0000 | 20.8212             | 0.0000 |  |
| Hotelling-Lawley trace    | 0.2012 | 2.0000 | 207.0000 | 20.8212             | 0.0000 |  |
| Roy's greatest root       | 0.2012 | 2.0000 | 207.0000 | 20.8212             | 0.0000 |  |

## PC LDA of benign vs lung cancer (wet swab subtracted)

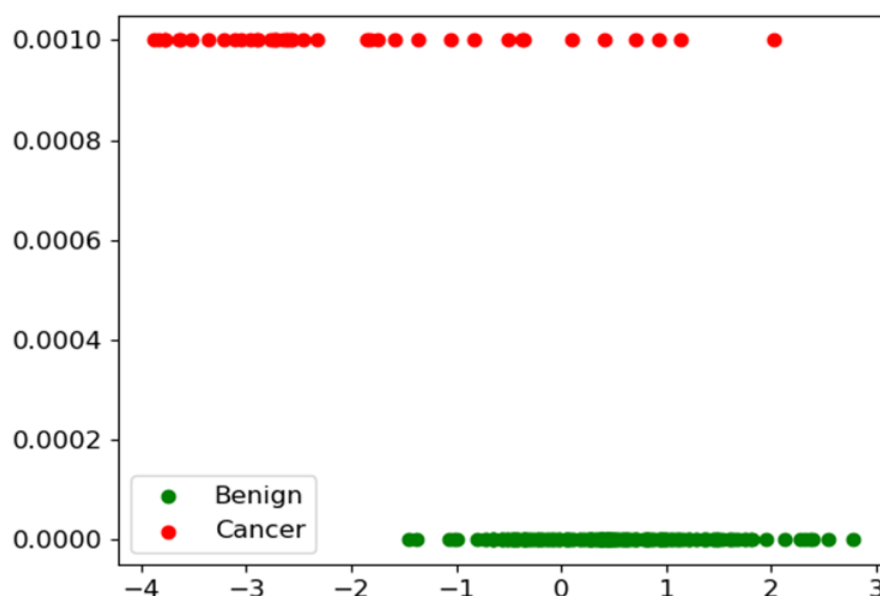

**Figure S3** Exploratory analysis of saliva samples minus a wet swab spectral signature following PCA. Following pairwise comparisons of benign *versus* cancer, four independent multivariate analysis of variance (MANOVA) tests were undertaken to test for significance of segregation. Separation between the categories is also examined employing PCA-LDA (using the first 10 PCs) in a 1-D scores plot.

**A**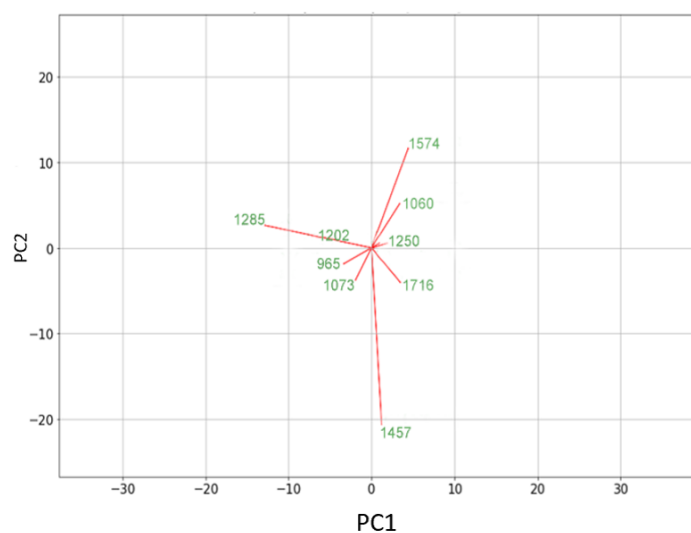**B**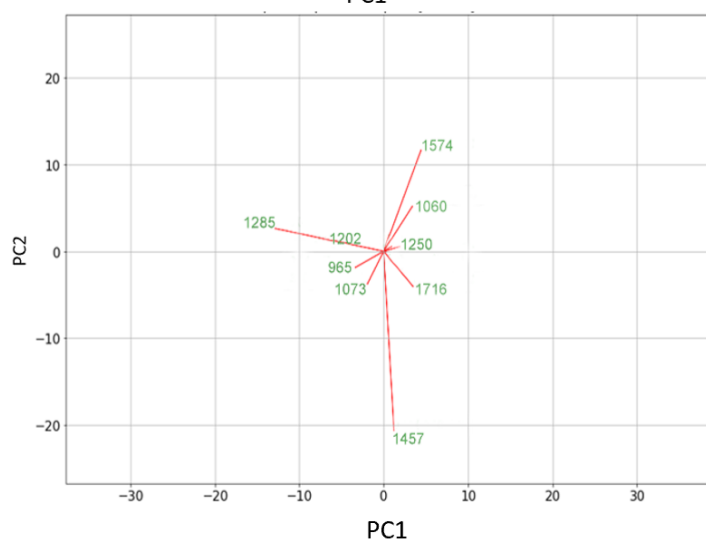**C**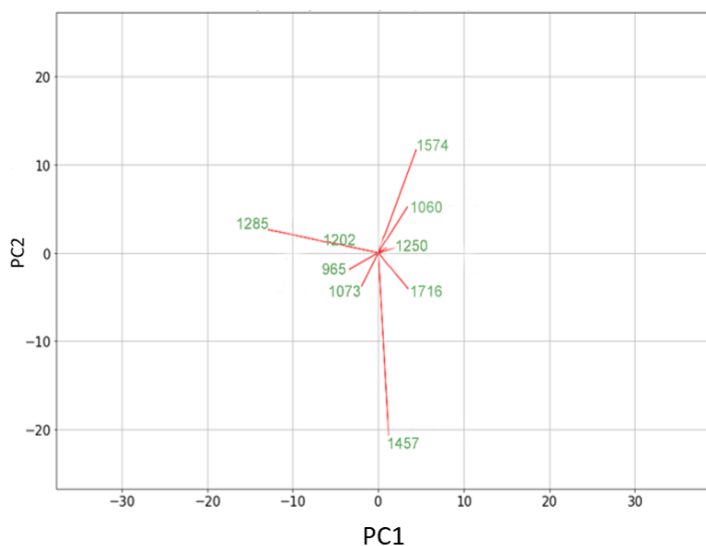

**Figure S4** The wavenumbers contributing the most to variance along each of the first 10 PCs (87.2% total variance). Obtained following pairwise comparisons: A) benign *versus* cancer following swab analysis; B) benign *versus* cancer following swab analysis with subtraction of dry swab spectra; and, C) benign *versus* cancer following swab analysis with subtraction of wet swab spectra.

**A**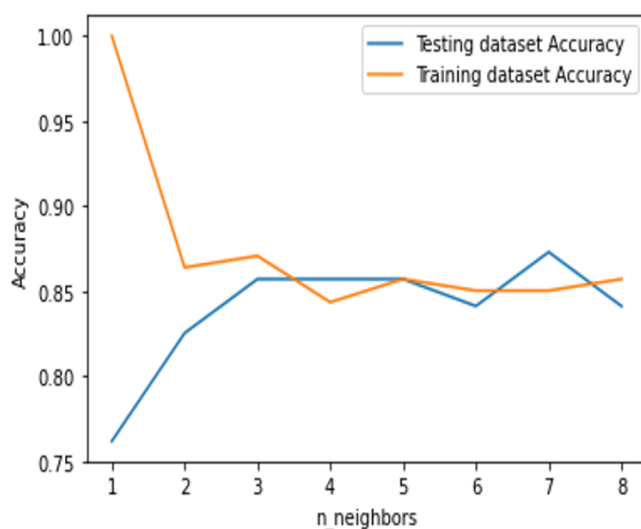**B**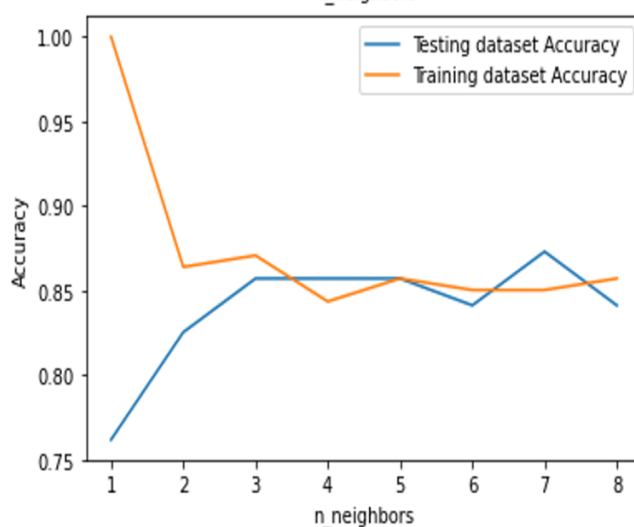**C**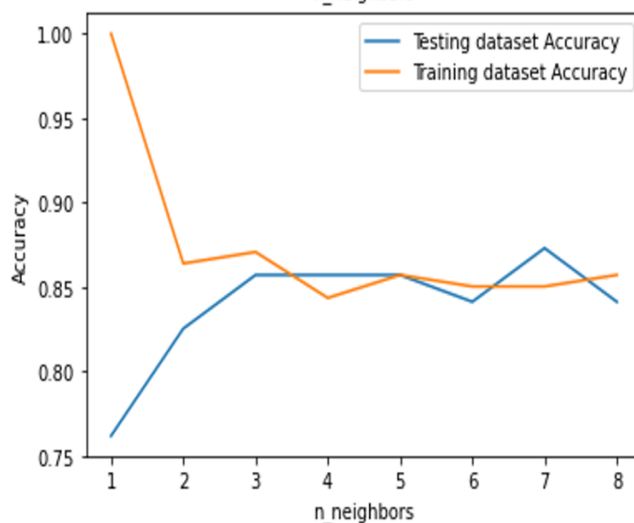

**Figure S5** Application of k-nearest neighbours (k-NN). A three nearest neighbours construction was undertaken for each of the three pairwise comparisons undertaken: A) benign *versus* cancer following swab analysis; B) benign *versus* cancer following swab analysis with subtraction of dry swab spectra; and, C) benign *versus* cancer following swab analysis with subtraction of wet swab spectra.
